# Supplementary material
Source: PubMed Central journal article supplement (PMC3032805)
Supplement: supp_kwq383_AJE-00817-2010_Web_Tables.pdf [file supp_kwq383_AJE-00817-2010_Web_Tables.pdf]

Web Table 1, supplemental. Age-adjusted Rate Ratios (RRs) for Male Pulmonary Tuberculosis Mortality, Region II (Exposed) Compared to Region V (Unexposed) of Chile, for 1958-2000.

| Year | Region II<br>Deaths | Region II<br>Person Years | Region V<br>Deaths | Region V<br>Person Years | RR (CI)           |
|------|---------------------|---------------------------|--------------------|--------------------------|-------------------|
| 1958 | 67                  | 107568                    | 175                | 350663                   | 1.26 (0.95, 1.67) |
| 1959 | 65                  | 109037                    | 191                | 358371                   | 1.12 (0.85, 1.48) |
| 1960 | 68                  | 110507                    | 189                | 366080                   | 1.19 (0.90, 1.57) |
| 1961 | 60                  | 112195                    | 263                | 376350                   | 0.78 (0.59, 1.04) |
| 1962 | 53                  | 113883                    | 195                | 386621                   | 0.94 (0.69, 1.27) |
| 1963 | 75                  | 115570                    | 252                | 396891                   | 1.05 (0.81, 1.36) |
| 1964 | 73                  | 117258                    | 241                | 407161                   | 1.08 (0.83, 1.41) |
| 1965 | 44                  | 118946                    | 144                | 417432                   | 1.13 (0.81, 1.58) |
| 1966 | 40                  | 120634                    | 253                | 427702                   | 0.59 (0.42, 0.82) |
| 1967 | 72                  | 122322                    | 208                | 437972                   | 1.32 (1.01, 1.72) |
| 1968 | 79                  | 124009                    | 210                | 448242                   | 1.47 (1.14, 1.91) |
| 1969 | 45                  | 125697                    | 169                | 458513                   | 1.06 (0.76, 1.47) |
| 1970 | 62                  | 127385                    | 163                | 468783                   | 1.52 (1.13, 2.04) |
| 1971 | 43                  | 131052                    | 181                | 478536                   | 0.96 (0.69, 1.34) |
| 1972 | 62                  | 134719                    | 155                | 488290                   | 1.59 (1.19, 2.14) |
| 1973 | 49                  | 138385                    | 105                | 498043                   | 1.89 (1.34, 2.65) |
| 1974 | 39                  | 142052                    | 113                | 507796                   | 1.42 (0.99, 2.05) |
| 1975 | 47                  | 145719                    | 120                | 517550                   | 1.60 (1.14, 2.24) |
| 1977 | 54                  | 153052                    | 112                | 537056                   | 2.01 (1.45, 2.79) |
| 1978 | 51                  | 156719                    | 99                 | 546810                   | 2.14 (1.52, 3.00) |
| 1979 | 55                  | 160386                    | 98                 | 556563                   | 2.33 (1.67, 3.24) |
| 1980 | 39                  | 164053                    | 95                 | 566316                   | 1.69 (1.17, 2.46) |
| 1981 | 26                  | 167719                    | 72                 | 576070                   | 1.51 (0.96, 2.37) |
| 1982 | 36                  | 171386                    | 58                 | 585823                   | 2.67 (1.76, 4.05) |
| 1983 | 36                  | 174926                    | 68                 | 594330                   | 2.24 (1.50, 3.37) |
| 1984 | 24                  | 178466                    | 61                 | 602836                   | 1.62 (1.01, 2.60) |
| 1985 | 21                  | 182006                    | 56                 | 611343                   | 1.58 (0.95, 2.61) |
| 1986 | 26                  | 185546                    | 46                 | 619849                   | 2.40 (1.48, 3.88) |
| 1987 | 27                  | 189086                    | 40                 | 628356                   | 2.93 (1.79, 4.79) |
| 1988 | 15                  | 192626                    | 47                 | 636863                   | 1.40 (0.78, 2.51) |
| 1989 | 16                  | 196166                    | 50                 | 645369                   | 1.35 (0.76, 2.37) |
| 1990 | 13                  | 199706                    | 52                 | 653876                   | 1.03 (0.56, 1.90) |
| 1991 | 13                  | 203246                    | 34                 | 662382                   | 1.70 (0.89, 3.23) |
| 1992 | 17                  | 206786                    | 32                 | 670889                   | 2.23 (1.23, 4.03) |
| 1993 | 11                  | 211724                    | 33                 | 679083                   | 1.35 (0.68, 2.69) |
| 1994 | 14                  | 216662                    | 39                 | 687277                   | 1.48 (0.80, 2.74) |
| 1995 | 8                   | 221600                    | 22                 | 695471                   | 1.44 (0.64, 3.26) |
| 1996 | 6                   | 226538                    | 39                 | 703665                   | 0.63 (0.27, 1.49) |
| 1997 | 11                  | 231476                    | 36                 | 711859                   | 1.28 (0.65, 2.53) |
| 1998 | 12                  | 236413                    | 34                 | 720052                   | 1.54 (0.79, 2.99) |
| 1999 | 6                   | 241351                    | 14                 | 728246                   | 1.68 (0.64, 4.39) |
| 2000 | 11                  | 246289                    | 22                 | 736440                   | 1.92 (0.92, 3.97) |

RR, rate ratio; CI, 95% confidence interval.

Web Table 2, supplemental. Age-adjusted Rate Ratios (RRs) for Female Pulmonary Tuberculosis Mortality, Region II (Exposed) Compared to Region V (Unexposed) of Chile, for 1958-2000.

| Year | Region II<br>Deaths | Region II<br>Person Years | Region V<br>Deaths | Region V<br>Person Years | RR (CI)           |
|------|---------------------|---------------------------|--------------------|--------------------------|-------------------|
| 1958 | 28                  | 100053                    | 85                 | 374535                   | 1.35 (0.88, 2.07) |
| 1959 | 25                  | 102382                    | 86                 | 383254                   | 1.17 (0.75, 1.82) |
| 1960 | 26                  | 104712                    | 99                 | 391973                   | 1.11 (0.72, 1.72) |
| 1961 | 30                  | 106700                    | 95                 | 402539                   | 1.32 (0.88, 1.99) |
| 1962 | 13                  | 108688                    | 103                | 413106                   | 0.53 (0.30, 0.94) |
| 1963 | 29                  | 110676                    | 102                | 423672                   | 1.22 (0.81, 1.85) |
| 1964 | 23                  | 112664                    | 98                 | 434238                   | 0.99 (0.63, 1.56) |
| 1965 | 23                  | 114652                    | 81                 | 444805                   | 1.17 (0.74, 1.86) |
| 1966 | 17                  | 116639                    | 116                | 455371                   | 0.65 (0.39, 1.08) |
| 1967 | 30                  | 118627                    | 83                 | 465937                   | 1.65 (1.08, 2.50) |
| 1968 | 26                  | 120615                    | 96                 | 476503                   | 1.20 (0.78, 1.86) |
| 1969 | 18                  | 122603                    | 63                 | 487070                   | 1.32 (0.78, 2.23) |
| 1970 | 18                  | 124591                    | 61                 | 497636                   | 1.38 (0.81, 2.33) |
| 1971 | 20                  | 128401                    | 61                 | 508188                   | 1.54 (0.93, 2.55) |
| 1972 | 22                  | 132212                    | 50                 | 518739                   | 2.06 (1.24, 3.40) |
| 1973 | 20                  | 136022                    | 34                 | 529291                   | 2.70 (1.55, 4.70) |
| 1974 | 19                  | 139833                    | 46                 | 539842                   | 1.94 (1.13, 3.31) |
| 1975 | 25                  | 143643                    | 44                 | 550394                   | 2.55 (1.56, 4.17) |
| 1977 | 14                  | 151264                    | 58                 | 571497                   | 1.10 (0.61, 1.97) |
| 1978 | 12                  | 155074                    | 39                 | 582048                   | 1.38 (0.72, 2.64) |
| 1979 | 7                   | 158885                    | 26                 | 592600                   | 1.24 (0.54, 2.86) |
| 1980 | 9                   | 162695                    | 46                 | 603151                   | 0.94 (0.46, 1.93) |
| 1981 | 5                   | 166506                    | 26                 | 613703                   | 0.87 (0.33, 2.28) |
| 1982 | 5                   | 170316                    | 25                 | 624254                   | 0.92 (0.35, 2.40) |
| 1983 | 8                   | 173678                    | 18                 | 633173                   | 2.12 (0.92, 4.89) |
| 1984 | 9                   | 177040                    | 21                 | 642093                   | 1.95 (0.89, 4.26) |
| 1985 | 4                   | 180403                    | 18                 | 651012                   | 1.04 (0.35, 3.09) |
| 1986 | 6                   | 183765                    | 20                 | 659931                   | 1.46 (0.58, 3.64) |
| 1987 | 5                   | 187127                    | 19                 | 668851                   | 1.21 (0.45, 3.26) |
| 1988 | 6                   | 190489                    | 10                 | 677770                   | 3.11 (1.12, 8.58) |
| 1989 | 6                   | 193851                    | 27                 | 686689                   | 1.00 (0.41, 2.44) |
| 1990 | 2                   | 197214                    | 16                 | 695608                   | 0.58 (0.13, 2.51) |
| 1991 | 3                   | 200576                    | 11                 | 704528                   | 1.22 (0.34, 4.38) |
| 1992 | 4                   | 203938                    | 8                  | 713447                   | 2.50 (0.75, 8.33) |
| 1993 | 4                   | 207326                    | 9                  | 720805                   | 2.39 (0.73, 7.77) |
| 1994 | 2                   | 210714                    | 8                  | 728162                   | 1.26 (0.27, 5.97) |
| 1995 | 4                   | 214102                    | 9                  | 735520                   | 2.10 (0.64, 6.87) |
| 1996 | 4                   | 217490                    | 7                  | 742878                   | 3.08 (0.90, 10.5) |
| 1997 | 7                   | 220879                    | 22                 | 750236                   | 1.47 (0.63, 3.46) |
| 1998 | 4                   | 224267                    | 23                 | 757593                   | 0.84 (0.29, 2.45) |
| 1999 | 4                   | 227655                    | 4                  | 764951                   | 5.07 (1.26, 20.4) |
| 2000 | 1                   | 231043                    | 7                  | 772309                   | 0.75 (0.09, 6.10) |

RR, rate ratio; CI, 95% confidence interval.
